# Supplementary material for: Adaptive lymphocyte profiles correlate to brain Aβ burden in patients with mild cognitive impairment
Source: J Neuroinflammation. 2017 Jul 27;14:149. doi: 10.1186/s12974-017-0910-x (PMC5530920; doi:10.1186/s12974-017-0910-x)
Supplement: Supplementary file 2 — Complete table of all Spearman rank order correlations performed for the manuscript. (XLSX 88 kb) [file 12974_2017_910_MOESM2_ESM.xlsx]

## Sheet: CompleteTable (2)
Correlations
			Age	PET_PCC	PET_PCC_ctrl_age	PET_PREC		PET_MEAN	AbetaCSF	GenLeukPer	TcellPer	CD4TcellPer	CD8TcellPer	BcellPerc	MemBPer	NvBPer	PlasmPer	InnatePer	GenLeukNo	TcellNo	CD4TcellNo	CD8TcellNo	BcellNo	MemBcellNo	NvBcellNo	PlasmNo	InnateNo	GenLeukPBL	TcellPBL	CD4TcellPBL	CD8TcellPBL	BcellPBL	MemBcellPBL	NvBcellPBL	PlasmPBL	InnatePBL	CD4to8CSF	CD4to8PBL	NvtoPlas	InnatetoPlas	IL6CSF	MemtoPlas	NvtoMemCSF	NvtoMemPBL	AbetaPBL	tauCSF	IgGCSF	IgGPBL	IFNgPBL
Spearman's rho	Age	Correlation Coefficient	1	.657**	-0.0150376	.544*	-0.209023	0.203008	-0.198193	-0.0391419	0.100552	-.488*	0.142331	0.293502	0.389732	-0.389732	.603**	0.195092	-0.14592	-0.284314	-0.296933	-0.183936	-0.0128742	0.144854	-0.21311	.480*	-0.122549	0.330281	0.147535	0.0986075	-0.0580039	-0.319367	0.00791688	-0.00791688	-0.0909469	-0.050509	-0.384509	0.0744888	-.588**	-.655*	-.632*	-.643**	-0.294349	-0.0110119	0.00661525	0.341034	-0.224894	-0.0480946	0.134228
		Sig. (2-tailed)		0.00164309	0.949828	0.0130826	0.376472	0.390666	0.376609	0.869858	0.700991	0.0468799	0.585798	0.209135	0.0893879	0.0893879	0.00486238	0.453031	0.539312	0.268732	0.247121	0.47976	0.957039	0.54231	0.366996	0.0323282	0.639378	0.114964	0.534781	0.679166	0.808081	0.128208	0.971401	0.971401	0.679827	0.832518	0.127532	0.754958	0.00812852	0.0151782	0.0273382	0.00969637	0.235758	0.960228	0.982094	0.232769	0.327026	0.835994	0.595411
		N	24	20	20	20	20	20	22	20	17	17	17	20	20	20	20	17	20	17	17	17	20	20	20	20	17	24	20	20	20	24	23	23	23	20	17	20	19	13	12	15	18	23	14	14	21	21	18
	PET_PCC	Correlation Coefficient	.657**	1	.690**	.489*	0.0285714	.493*	-.513*	-0.191294	-0.158416	-0.349451	-0.0528053	0.246946	0.159804	-0.159804	0.279907	0.367437	-0.409565	-.569*	-.540*	-0.464247	-0.321597	-0.245686	-0.303013	-0.087366	-0.389011	0.141401	-0.00589102	0.159058	-0.156112	-0.278891	-0.00150603	0.00150603	-0.0872892	0.172567	-0.20239	0.121836	-0.292955	-0.4019	-.661*	-0.396704	-0.141684	-0.0441944	-0.103639	0.314632	0.198773	0.35252	0.296703
		Sig. (2-tailed)	0.00164309		0.000756395	0.028772	0.904822	0.0271142	0.0295066	0.462046	0.588569	0.22069	0.857716	0.339303	0.540101	0.540101	0.276544	0.196209	0.102553	0.0336194	0.0463986	0.0944652	0.208122	0.341853	0.237109	0.738817	0.169217	0.552079	0.982725	0.556273	0.563701	0.233757	0.994972	0.994972	0.714415	0.522759	0.487741	0.653078	0.270832	0.220473	0.0375532	0.17957	0.587522	0.853224	0.724404	0.273248	0.44438	0.165198	0.302967
		N	20	20	20	20	20	20	18	17	14	14	14	17	17	17	17	14	17	14	14	14	17	17	17	17	14	20	16	16	16	20	20	20	20	16	14	16	16	11	10	13	17	20	14	14	17	17	14
	PET_PCC_ctrl_age	Correlation Coefficient	-0.0150376	.690**	1	0.171429	0.296241	.526*	-0.409701	0.0649908	0.0132013	-0.107692	-0.261826	-0.0831554	0.023356	-0.023356	-0.147968	0.10121	-0.272226	-0.318681	-0.26652	-0.193619	-0.361178	-0.308683	-0.33056	-0.326386	-0.305495	0.0219285	-0.0265096	0.0986746	-0.0765833	-0.10031	0.0060241	-0.0060241	-0.220648	0.172567	0.102332	0.0827278	0.0327158	-0.175543	-0.130893	-0.201146	-0.0929325	-0.0365747	-0.218303	-0.0462046	.487*	.550*	0.296703
		Sig. (2-tailed)	0.949828	0.000756395		0.469886	0.204718	0.0171307	0.0913184	0.804278	0.964274	0.714031	0.365865	0.751021	0.929101	0.929101	0.570882	0.730641	0.290488	0.266785	0.357014	0.50718	0.154341	0.228009	0.195004	0.201043	0.28817	0.926886	0.922367	0.716179	0.778022	0.673918	0.979891	0.979891	0.34988	0.522759	0.727758	0.760678	0.904262	0.605657	0.718528	0.509926	0.722774	0.878331	0.453389	0.875366	0.0473485	0.022049	0.302967
		N	20	20	20	20	20	20	18	17	14	14	14	17	17	17	17	14	17	14	14	14	17	17	17	17	14	20	16	16	16	20	20	20	20	16	14	16	16	11	10	13	17	20	14	14	17	17	14
	PET_PREC	Correlation Coefficient	.544*	.489*	0.171429	1	.645**	.732**	-0.358101	0.0380135	0.107811	-0.389011	0.0418042	0.104574	0.381071	-0.381071	0.392116	0.314632	-0.00367873	-0.120879	-0.211454	-0.0638064	0.0395812	0.127253	-0.151507	.514*	0.0813187	0.32061	0.0206186	-0.335788	0.371134	-.584**	0.0120482	-0.0120482	-0.239237	0.168142	-0.218309	-0.324895	-.576*	-0.378802	-0.448775	-0.474927	-0.335167	-0.0358127	-0.105844	0.279428	0.00245399	0.0235013	-0.0725275
		Sig. (2-tailed)	0.0130826	0.028772	0.469886		0.00213069	0.000241216	0.144529	0.884832	0.713728	0.169217	0.887164	0.689579	0.131263	0.131263	0.119542	0.273248	0.98882	0.680607	0.468027	0.82844	0.880114	0.626471	0.561602	0.0346725	0.782275	0.168143	0.939585	0.203547	0.156991	0.00690346	0.959793	0.959793	0.309696	0.533633	0.453378	0.219518	0.0196685	0.250624	0.193272	0.101003	0.188478	0.880848	0.718755	0.333291	0.992542	0.928661	0.805376
		N	20	20	20	20	20	20	18	17	14	14	14	17	17	17	17	14	17	14	14	14	17	17	17	17	14	20	16	16	16	20	20	20	20	16	14	16	16	11	10	13	17	20	14	14	17	17	14
	PET_PREC_ctrl_age	Correlation Coefficient	-0.209023	0.0285714	0.296241	.645**	1	.764**	-0.318885	0.278357	0.167217	-0.138462	-0.0748075	-0.161271	0.31592	-0.31592	0.0789164	0.182618	0.236665	0.195604	0.0484583	0.290429	0.22017	0.268365	-0.0633573	0.46815	0.375824	0.106618	-0.00736378	-0.406481	0.472755	-0.311568	0.0361446	-0.0361446	-0.278032	0.126844	-0.0181924	-0.389573	-0.352438	-0.0415759	0.0560968	-0.184383	-0.321455	-0.0441944	-0.194047	-0.156216	0.244172	0.0927684	-0.292308
		Sig. (2-tailed)	0.376472	0.904822	0.204718	0.00213069		8.84726e-05	0.197128	0.279324	0.56774	0.636885	0.79937	0.536339	0.21672	0.21672	0.763364	0.53205	0.360425	0.50275	0.869334	0.31379	0.395808	0.297654	0.809111	0.0580642	0.18541	0.654595	0.978407	0.118197	0.0644158	0.181148	0.879751	0.879751	0.23526	0.6397	0.95078	0.135815	0.180623	0.903398	0.877674	0.546492	0.208334	0.853224	0.506224	0.593824	0.344931	0.723246	0.310526
		N	20	20	20	20	20	20	18	17	14	14	14	17	17	17	17	14	17	14	14	14	17	17	17	17	14	20	16	16	16	20	20	20	20	16	14	16	16	11	10	13	17	20	14	14	17	17	14
	PET_MEAN	Correlation Coefficient	0.203008	.493*	.526*	.732**	.764**	1	-.515*	0.0318823	0.0418042	-0.30989	-0.169417	0.0944947	.565*	-.565*	0.181261	0.376238	-0.0907419	-0.134066	-0.22467	-0.107811	0.0593718	0.17009	-0.236901	0.407159	0.142857	0.17316	-0.12813	-0.326952	0.340207	-0.430875	0.158886	-0.158886	-0.250552	0.348084	-0.0523031	-0.345953	-.540*	-0.175543	-0.0560968	-0.268194	-0.469233	-0.179826	-0.178612	0.206821	0.0404908	0.0568979	0.0461538
		Sig. (2-tailed)	0.390666	0.0271142	0.0171307	0.000241216	8.84726e-05		0.0287488	0.903318	0.887164	0.280933	0.562581	0.718291	0.018	0.018	0.486282	0.184888	0.729075	0.64772	0.439987	0.713728	0.82093	0.513972	0.359931	0.104787	0.626117	0.465345	0.636283	0.216443	0.197289	0.0578775	0.503447	0.503447	0.286664	0.186446	0.859057	0.18934	0.0309042	0.605657	0.877674	0.375647	0.0574077	0.448069	0.541239	0.478056	0.877378	0.828285	0.875503
		N	20	20	20	20	20	20	18	17	14	14	14	17	17	17	17	14	17	14	14	14	17	17	17	17	14	20	16	16	16	20	20	20	20	16	14	16	16	11	10	13	17	20	14	14	17	17	14
	AbetaCSF	Correlation Coefficient	-0.198193	-.513*	-0.409701	-0.358101	-0.318885	-.515*	1	.461*	0.259963	0.168409	-0.161963	-0.173328	-0.404083	0.404083	-0.231155	-0.413497	0.197067	0.35049	0.393865	0.253832	0.0234766	0.019927	0.256062	-0.0139446	0.117647	-0.235762	0.0316067	0.171203	-0.195165	0.232084	0.0266667	-0.0266667	0.224936	-0.109059	0.361439	0.247925	0.345764	0.216347	0.0426342	0.287055	0.294349	-0.0328538	0.143861	-0.129813	-.454*	0.138354	-0.0464636
		Sig. (2-tailed)	0.376609	0.0295066	0.0913184	0.144529	0.197128	0.0287488		0.0409427	0.31361	0.518203	0.534568	0.464905	0.0772276	0.0772276	0.326809	0.0989751	0.404972	0.167815	0.117755	0.325565	0.921739	0.933545	0.275843	0.953471	0.652933	0.290851	0.897794	0.483431	0.423307	0.298663	0.908652	0.908652	0.326935	0.656728	0.154022	0.306116	0.147058	0.477748	0.895334	0.299574	0.235758	0.887575	0.655557	0.658264	0.0385387	0.549783	0.85474
		N	22	18	18	18	18	18	22	20	17	17	17	20	20	20	20	17	20	17	17	17	20	20	20	20	17	22	19	19	19	22	21	21	21	19	17	19	19	13	12	15	18	21	12	14	21	21	18
	GenLeukPer	Correlation Coefficient	-0.0391419	-0.191294	0.0649908	0.0380135	0.278357	0.0318823	.461*	1	0.403929	-0.144616	-0.109337	-0.245632	-0.0366732	0.0366732	-0.243177	-0.339066	0.0948795	0.242945	0.244472	0.244322	-0.0682348	-0.0076729	-0.114945	0.0967917	0.0429448	0.133838	.549*	0.0288698	0.0694957	-0.0289541	0.171946	-0.171946	0.214348	-.492*	0.144368	0.106457	0.175696	0.0183134	-0.297941	0.00273008	0.223936	-0.122864	0.388128	-0.0730028	-0.0457143	0.144857	-0.336772
		Sig. (2-tailed)	0.869858	0.462046	0.804278	0.884832	0.279324	0.903318	0.0409427		0.10784	0.579734	0.676148	0.296545	0.878006	0.878006	0.301553	0.183068	0.690709	0.347437	0.34432	0.344626	0.775001	0.974388	0.629413	0.68478	0.870004	0.573746	0.0223441	0.912419	0.790984	0.903553	0.468527	0.468527	0.364152	0.0448408	0.58039	0.684259	0.471848	0.952649	0.373537	0.992296	0.371699	0.605823	0.23818	0.81265	0.852576	0.554062	0.202142
		N	20	17	17	17	17	17	20	20	17	17	17	20	20	20	20	17	20	17	17	17	20	20	20	20	17	20	17	17	17	20	20	20	20	17	17	17	19	13	11	15	18	20	11	13	19	19	16
	TcellPer	Correlation Coefficient	0.100552	-0.158416	0.0132013	0.107811	0.167217	0.0418042	0.259963	0.403929	1	-0.0442806	0.101289	-0.0719066	0.420925	-0.420925	-0.190744	-.688**	0.0932515	0.304108	0.176182	0.393252	0.151949	0.289354	-0.352458	0.306907	-0.0637646	0.192596	.583*	-.552*	.589*	-0.115719	-0.0258144	0.0258144	-0.291764	-.539*	-0.0711778	-.495*	-0.134654	-0.101149	-0.514773	0.175504	-0.188817	0.0391089	-0.214286	0.237083	-0.38575	-0.339511	-0.112211
		Sig. (2-tailed)	0.700991	0.588569	0.964274	0.713728	0.56774	0.887164	0.31361	0.10784		0.865994	0.698895	0.783892	0.092462	0.092462	0.463358	0.00228844	0.721858	0.235334	0.498783	0.11838	0.560446	0.259965	0.165277	0.230834	0.807905	0.458945	0.0140752	0.0214557	0.0128899	0.658293	0.921659	0.921659	0.255836	0.0255802	0.786034	0.0431451	0.606371	0.74231	0.156171	0.566298	0.500346	0.881535	0.610344	0.509561	0.126205	0.182457	0.70252
		N	17	14	14	14	14	14	17	17	17	17	17	17	17	17	17	17	17	17	17	17	17	17	17	17	17	17	17	17	17	17	17	17	17	17	17	17	17	13	9	13	15	17	8	10	17	17	14
	CD4TcellPer	Correlation Coefficient	-.488*	-0.349451	-0.107692	-0.389011	-0.138462	-0.30989	0.168409	-0.144616	-0.0442806	1	-0.44677	-0.459692	-0.0493523	0.0493523	-0.207922	-0.436308	0.425586	0.472037	.593*	0.330874	0.0619201	0.0678078	0.364681	-0.410217	0.237248	-0.30817	0.0246003	-0.0916925	0.0831793	0.280291	-0.429452	0.429452	0.4186	-0.116923	.674**	-0.0845656	0.200621	0.401487	0.0675111	0.442765	0.21762	0.382095	-0.333333	-0.279637	-0.10037	0.211141	0.379428
		Sig. (2-tailed)	0.0468799	0.22069	0.714031	0.169217	0.636885	0.280933	0.518203	0.579734	0.865994		0.0721962	0.0633843	0.850799	0.850799	0.42325	0.0799627	0.0885363	0.0557341	0.0121799	0.194554	0.813369	0.795959	0.150091	0.101953	0.359208	0.228822	0.925334	0.726339	0.750952	0.275858	0.085372	0.085372	0.0944669	0.654944	0.00298981	0.746928	0.44007	0.173902	0.862989	0.12973	0.435906	0.130144	0.419753	0.433926	0.70151	0.415942	0.180889
		N	17	14	14	14	14	14	17	17	17	17	17	17	17	17	17	17	17	17	17	17	17	17	17	17	17	17	17	17	17	17	17	17	17	17	17	17	17	13	9	13	15	17	8	10	17	17	14
	CD8TcellPer	Correlation Coefficient	0.142331	-0.0528053	-0.261826	0.0418042	-0.0748075	-0.169417	-0.161963	-0.109337	0.101289	-0.44677	1	-0.0252459	0.247538	-0.247538	0.425578	-0.114865	-0.163904	-0.179141	-0.273956	0.0313076	-0.135973	-0.149153	-0.330674	0.209056	-0.196319	0.294631	0.219153	-0.212531	0.245388	0.0143955	0.252768	-0.252768	0.127223	-0.252457	-.921**	-0.256379	-0.35353	-.587*	-0.215192	-0.539791	-0.294427	-0.21989	-0.238095	0.0790277	-0.0682237	-0.248499	-0.203969
		Sig. (2-tailed)	0.585798	0.857716	0.365865	0.887164	0.79937	0.562581	0.534568	0.676148	0.698895	0.0721962		0.92338	0.33811	0.33811	0.0885426	0.660673	0.529615	0.491481	0.287311	0.905053	0.602816	0.567768	0.19484	0.420669	0.450138	0.250979	0.39805	0.41281	0.342459	0.956269	0.327667	0.327667	0.626553	0.328282	1.60947e-07	0.320568	0.163906	0.0350811	0.578181	0.0569008	0.286775	0.396426	0.570156	0.828202	0.794733	0.336177	0.484279
		N	17	14	14	14	14	14	17	17	17	17	17	17	17	17	17	17	17	17	17	17	17	17	17	17	17	17	17	17	17	17	17	17	17	17	17	17	17	13	9	13	15	17	8	10	17	17	14
	BcellPerc	Correlation Coefficient	0.293502	0.246946	-0.0831554	0.104574	-0.161271	0.0944947	-0.173328	-0.245632	-0.0719066	-0.459692	-0.0252459	1	-0.0212807	0.0212807	0.170054	0.393836	-0.426547	-0.47278	-.562*	-.502*	0.294457	0.21398	0.123559	0.196209	-0.213066	0.0383053	-0.0706451	0.0934098	-0.0461304	-0.164924	0.133521	-0.133521	-0.332229	0.0681639	-0.181303	-0.0038835	-0.163053	0.0303915	-0.0213806	0.153847	0.0985742	-0.145654	0.209836	0.492374	-0.188464	-.551*	0.0345941
		Sig. (2-tailed)	0.209135	0.339303	0.751021	0.689579	0.536339	0.718291	0.464905	0.296545	0.783892	0.0633843	0.92338		0.929041	0.929041	0.473509	0.117785	0.060724	0.0552965	0.0189478	0.0400011	0.207587	0.364996	0.603769	0.40706	0.411606	0.872618	0.787601	0.721404	0.860447	0.487147	0.574662	0.574662	0.152391	0.794909	0.486179	0.988198	0.504793	0.921489	0.950248	0.584083	0.697172	0.540058	0.535738	0.0873944	0.439708	0.0144289	0.898791
		N	20	17	17	17	17	17	20	20	17	17	17	20	20	20	20	17	20	17	17	17	20	20	20	20	17	20	17	17	17	20	20	20	20	17	17	17	19	13	11	15	18	20	11	13	19	19	16
	MemBPer	Correlation Coefficient	0.389732	0.159804	0.023356	0.381071	0.31592	.565*	-0.404083	-0.0366732	0.420925	-0.0493523	0.247538	-0.0212807	1	-1.000**	0.37229	-0.245075	-0.0238007	0.0799513	0.000615765	0.167385	0.0483075	0.304498	-.515*	0.374479	0.0492008	.490*	0.299078	-.538*	.603*	-0.343664	0.208098	-0.208098	-0.222983	-0.211823	-0.324825	-.626**	-.786**	-.579*	-0.506982	-0.423392	-.791**	-0.20177	-0.13242	0.187328	-0.389256	-0.318248	0.201626
		Sig. (2-tailed)	0.0893879	0.540101	0.929101	0.131263	0.21672	0.018	0.0772276	0.878006	0.092462	0.850799	0.33811	0.929041			0.105996	0.343094	0.920662	0.760346	0.998129	0.520786	0.839725	0.19178	0.0200635	0.103798	0.851252	0.0283847	0.243558	0.0260464	0.0104039	0.137921	0.378636	0.378636	0.344673	0.414403	0.203333	0.00713286	6.56614e-05	0.0383073	0.111464	0.115819	9.17681e-05	0.393624	0.697923	0.539989	0.0995046	0.18422	0.453964
		N	20	17	17	17	17	17	20	20	17	17	17	20	20	20	20	17	20	17	17	17	20	20	20	20	17	20	17	17	17	20	20	20	20	17	17	17	19	13	11	15	18	20	11	13	19	19	16
	NvBPer	Correlation Coefficient	-0.389732	-0.159804	-0.023356	-0.381071	-0.31592	-.565*	0.404083	0.0366732	-0.420925	0.0493523	-0.247538	0.0212807	-1.000**	1	-0.37229	0.245075	0.0238007	-0.0799513	-0.000615765	-0.167385	-0.0483075	-0.304498	.515*	-0.374479	-0.0492008	-.490*	-0.299078	.538*	-.603*	0.343664	-0.208098	0.208098	0.222983	0.211823	0.324825	.626**	.786**	.579*	0.506982	0.423392	.791**	0.20177	0.13242	-0.187328	0.389256	0.318248	-0.201626
		Sig. (2-tailed)	0.0893879	0.540101	0.929101	0.131263	0.21672	0.018	0.0772276	0.878006	0.092462	0.850799	0.33811	0.929041			0.105996	0.343094	0.920662	0.760346	0.998129	0.520786	0.839725	0.19178	0.0200635	0.103798	0.851252	0.0283847	0.243558	0.0260464	0.0104039	0.137921	0.378636	0.378636	0.344673	0.414403	0.203333	0.00713286	6.56614e-05	0.0383073	0.111464	0.115819	9.17681e-05	0.393624	0.697923	0.539989	0.0995046	0.18422	0.453964
		N	20	17	17	17	17	17	20	20	17	17	17	20	20	20	20	17	20	17	17	17	20	20	20	20	17	20	17	17	17	20	20	20	20	17	17	17	19	13	11	15	18	20	11	13	19	19	16
	PlasmPer	Correlation Coefficient	.603**	0.279907	-0.147968	0.392116	0.0789164	0.181261	-0.231155	-0.243177	-0.190744	-0.207922	0.425578	0.170054	0.37229	-0.37229	1	0.15936	0.075059	-0.0419504	-0.0833861	0.016667	0.108397	0.230992	-0.111569	.454*	0.188777	0.28626	0.0444453	0.0870921	0.0909099	-0.431534	0.262343	-0.262343	0.0250464	-0.000617675	-.487*	-0.0766456	-.896**	-.871**	-0.517204	-.929**	-0.317743	-0.272383	-0.484018	-0.030303	-0.164608	-0.201449	0.0583459
		Sig. (2-tailed)	0.00486238	0.276544	0.570882	0.119542	0.763364	0.486282	0.326809	0.301553	0.463358	0.42325	0.0885426	0.473509	0.105996	0.105996		0.541242	0.753138	0.872991	0.750351	0.949377	0.649184	0.327161	0.639576	0.044593	0.468069	0.221115	0.8655	0.739609	0.728591	0.0574533	0.263821	0.263821	0.916523	0.998123	0.0473389	0.769999	2.09503e-07	0.000107015	0.103255	5.54126e-07	0.198828	0.245305	0.131412	0.921717	0.500682	0.408229	0.830053
		N	20	17	17	17	17	17	20	20	17	17	17	20	20	20	20	17	20	17	17	17	20	20	20	20	17	20	17	17	17	20	20	20	20	17	17	17	19	13	11	15	18	20	11	13	19	19	16
	InnatePer	Correlation Coefficient	0.195092	0.367437	0.10121	0.314632	0.182618	0.376238	-0.413497	-0.339066	-.688**	-0.436308	-0.114865	0.393836	-0.245075	0.245075	0.15936	1	-0.165746	-0.357055	-0.40172	-0.416206	0.116195	0.00626692	0.178671	0.126875	0.109203	-0.0290307	-.577*	0.374693	-0.442805	-0.24535	0.221402	-0.221402	-0.129902	.674**	-0.110361	0.380473	-0.0395558	0.12239	0.59666	-0.154824	0.102409	-0.21989	0.357143	-0.0911858	0.323909	0.0534744	-0.199339
		Sig. (2-tailed)	0.453031	0.196209	0.730641	0.273248	0.53205	0.184888	0.0989751	0.183068	0.00228844	0.0799627	0.660673	0.117785	0.343094	0.343094	0.541242		0.524936	0.159448	0.109964	0.0965628	0.656969	0.980955	0.492638	0.627504	0.676525	0.911932	0.0152985	0.138384	0.0750719	0.342535	0.393102	0.393102	0.619249	0.00301862	0.67327	0.131919	0.88019	0.690392	0.0898701	0.61353	0.716473	0.396426	0.385121	0.802181	0.204685	0.838485	0.494463
		N	17	14	14	14	14	14	17	17	17	17	17	17	17	17	17	17	17	17	17	17	17	17	17	17	17	17	17	17	17	17	17	17	17	17	17	17	17	13	9	13	15	17	8	10	17	17	14
	GenLeukNo	Correlation Coefficient	-0.14592	-0.409565	-0.272226	-0.00367873	0.236665	-0.0907419	0.197067	0.0948795	0.0932515	0.425586	-0.163904	-0.426547	-0.0238007	0.0238007	0.075059	-0.165746	1	.954**	.910**	.912**	.686**	.686**	.550*	.463*	.925**	-0.386101	-0.279141	-0.0871701	0.038107	0.161793	-0.247551	0.247551	0.082029	0.193984	0.317415	-0.00251814	-0.0838181	0.347475	0.0921747	0.395508	-0.0942402	0.302734	-0.405468	-0.247593	-0.184974	-0.127755	-0.107511
		Sig. (2-tailed)	0.539312	0.102553	0.290488	0.98882	0.360425	0.729075	0.404972	0.690709	0.721858	0.0885363	0.529615	0.060724	0.920662	0.920662	0.753138	0.524936		2.99308e-09	3.92571e-07	3.53716e-07	0.000839696	0.000843339	0.0119287	0.0399617	1.12169e-07	0.0926765	0.277916	0.739384	0.88455	0.495567	0.292667	0.292667	0.730994	0.455652	0.214435	0.992347	0.732989	0.244705	0.787512	0.144512	0.709928	0.194497	0.216016	0.414743	0.448378	0.602221	0.691875
		N	20	17	17	17	17	17	20	20	17	17	17	20	20	20	20	17	20	17	17	17	20	20	20	20	17	20	17	17	17	20	20	20	20	17	17	17	19	13	11	15	18	20	11	13	19	19	16
	TcellNo	Correlation Coefficient	-0.284314	-.569*	-0.318681	-0.120879	0.195604	-0.134066	0.35049	0.242945	0.304108	0.472037	-0.179141	-0.47278	0.0799513	-0.0799513	-0.0419504	-0.357055	.954**	1	.948**	.938**	.642**	.676**	.490*	0.344159	.843**	-0.323265	-0.128755	-0.213497	0.147421	0.30131	-0.323097	0.323097	0.0628648	0.0662577	0.370411	-0.0817895	-0.0790145	0.379309	0.15967	.557*	-0.147082	0.366033	-0.333333	-0.340427	-0.346225	-0.245052	0.10121
		Sig. (2-tailed)	0.268732	0.0336194	0.266785	0.680607	0.50275	0.64772	0.167815	0.347437	0.235334	0.0557341	0.491481	0.0552965	0.760346	0.760346	0.872991	0.159448	2.99308e-09		6.92099e-09	2.66241e-08	0.00546129	0.00289211	0.045821	0.176159	2.13281e-05	0.205639	0.62237	0.410638	0.572324	0.239887	0.205888	0.205888	0.810569	0.800534	0.143311	0.754992	0.763078	0.201164	0.681556	0.0479214	0.600915	0.148471	0.419753	0.335782	0.173406	0.34314	0.730641
		N	17	14	14	14	14	14	17	17	17	17	17	17	17	17	17	17	17	17	17	17	17	17	17	17	17	17	17	17	17	17	17	17	17	17	17	17	17	13	9	13	15	17	8	10	17	17	14
	CD4TcellNo	Correlation Coefficient	-0.296933	-.540*	-0.26652	-0.211454	0.0484583	-0.22467	0.393865	0.244472	0.176182	.593*	-0.273956	-.562*	0.000615765	-0.000615765	-0.0833861	-0.40172	.910**	.948**	1	.845**	0.46478	.508*	.523*	0.18022	.755**	-0.303896	-0.179865	-0.137592	0.092866	0.390557	-0.426815	0.426815	0.0917346	0.0866093	.502*	-0.0302363	0.0370835	0.303447	0.130803	0.479155	-0.102501	0.462762	-0.238095	-0.316111	-0.247081	-0.091221	0.228225
		Sig. (2-tailed)	0.247121	0.0463986	0.357014	0.468027	0.869334	0.439987	0.117755	0.34432	0.498783	0.0121799	0.287311	0.0189478	0.998129	0.998129	0.750351	0.109964	3.92571e-07	6.92099e-09		1.93431e-05	0.0601424	0.0372416	0.0313474	0.488831	0.0004641	0.235677	0.489703	0.598464	0.722965	0.12115	0.0875214	0.0875214	0.726218	0.741006	0.0401513	0.908289	0.887632	0.313511	0.737301	0.0975809	0.716228	0.0614133	0.570156	0.373561	0.339032	0.727696	0.432591
		N	17	14	14	14	14	14	17	17	17	17	17	17	17	17	17	17	17	17	17	17	17	17	17	17	17	17	17	17	17	17	17	17	17	17	17	17	17	13	9	13	15	17	8	10	17	17	14
	CD8TcellNo	Correlation Coefficient	-0.183936	-0.464247	-0.193619	-0.0638064	0.290429	-0.107811	0.253832	0.244322	0.393252	0.330874	0.0313076	-.502*	0.167385	-0.167385	0.016667	-0.416206	.912**	.938**	.845**	1	.613**	.660**	0.36645	0.408489	.786**	-0.223461	-0.0625767	-0.205648	0.141979	0.314631	-0.287646	0.287646	0.0468429	0.00306937	0.133378	-0.077433	-0.15442	0.221966	-0.0420183	0.417868	-0.256023	0.333977	-0.619048	-0.25532	-0.311425	-0.209994	-0.0176211
		Sig. (2-tailed)	0.47976	0.0944652	0.50718	0.82844	0.31379	0.713728	0.325565	0.344626	0.11838	0.194554	0.905053	0.0400011	0.520786	0.520786	0.949377	0.0965628	3.53716e-07	2.66241e-08	1.93431e-05		0.0089205	0.00392819	0.147974	0.103547	0.000183427	0.388603	0.811423	0.428453	0.586735	0.218704	0.262915	0.262915	0.858312	0.990672	0.609817	0.767696	0.554011	0.4661	0.914527	0.155363	0.357033	0.190149	0.101733	0.476493	0.223688	0.41854	0.952324
		N	17	14	14	14	14	14	17	17	17	17	17	17	17	17	17	17	17	17	17	17	17	17	17	17	17	17	17	17	17	17	17	17	17	17	17	17	17	13	9	13	15	17	8	10	17	17	14
	BcellNo	Correlation Coefficient	-0.0128742	-0.321597	-0.361178	0.0395812	0.22017	0.0593718	0.0234766	-0.0682348	0.151949	0.0619201	-0.135973	0.294457	0.0483075	-0.0483075	0.108397	0.116195	.686**	.642**	0.46478	.613**	1	.929**	.642**	.658**	.807**	-0.334729	-0.265602	-0.139681	0.0841594	0.101956	-0.133538	0.133538	-0.201887	0.212612	0.132996	-0.0697211	-0.218906	.562*	0.292741	.587*	-0.126572	0.193094	-0.18434	0.00416099	-0.391347	-.557*	-0.0821014
		Sig. (2-tailed)	0.957039	0.208122	0.154341	0.880114	0.395808	0.82093	0.921739	0.775001	0.560446	0.813369	0.602816	0.207587	0.839725	0.839725	0.649184	0.656969	0.000839696	0.00546129	0.0601424	0.0089205		3.49963e-09	0.00226154	0.00161987	8.89482e-05	0.149142	0.302846	0.592867	0.748106	0.668855	0.574614	0.574614	0.393342	0.412626	0.61085	0.790321	0.367907	0.0455721	0.382334	0.0212827	0.616745	0.414695	0.587405	0.989236	0.0975426	0.0132416	0.762441
		N	20	17	17	17	17	17	20	20	17	17	17	20	20	20	20	17	20	17	17	17	20	20	20	20	17	20	17	17	17	20	20	20	20	17	17	17	19	13	11	15	18	20	11	13	19	19	16
	MemBcellNo	Correlation Coefficient	0.144854	-0.245686	-0.308683	0.127253	0.268365	0.17009	0.019927	-0.0076729	0.289354	0.0678078	-0.149153	0.21398	0.304498	-0.304498	0.230992	0.00626692	.686**	.676**	.508*	.660**	.929**	1	0.4412	.752**	.794**	-0.175538	-0.164719	-0.171714	0.17067	0.0139647	-0.0917603	0.0917603	-0.302677	0.117191	0.13289	-0.154886	-0.410631	0.341411	0.0549053	0.397814	-0.295243	0.140251	-0.116299	-0.00423866	-0.442953	-.497*	-0.0647844
		Sig. (2-tailed)	0.54231	0.341853	0.228009	0.626471	0.297654	0.513972	0.933545	0.974388	0.259965	0.795959	0.567768	0.364996	0.19178	0.19178	0.327161	0.980955	0.000843339	0.00289211	0.0372416	0.00392819	3.49963e-09		0.0514974	0.000129629	0.000142982	0.459141	0.527543	0.509903	0.512517	0.953404	0.700419	0.700419	0.194585	0.654199	0.611137	0.5528	0.0807473	0.253592	0.872618	0.141974	0.234272	0.555351	0.733461	0.989035	0.0575206	0.0303848	0.811597
		N	20	17	17	17	17	17	20	20	17	17	17	20	20	20	20	17	20	17	17	17	20	20	20	20	17	20	17	17	17	20	20	20	20	17	17	17	19	13	11	15	18	20	11	13	19	19	16
	NvBcellNo	Correlation Coefficient	-0.21311	-0.303013	-0.33056	-0.151507	-0.0633573	-0.236901	0.256062	-0.114945	-0.352458	0.364681	-0.330674	0.123559	-.515*	.515*	-0.111569	0.178671	.550*	.490*	.523*	0.36645	.642**	0.4412	1	0.212429	.642**	-.535*	-.533*	0.169337	-0.229621	.497*	-.543*	.543*	0.129209	0.379342	0.428289	0.198954	0.315258	.617*	.640*	.534*	0.276611	.565**	-0.214793	-0.111381	-0.0977531	-0.0677801	-0.0358378
		Sig. (2-tailed)	0.366996	0.237109	0.195004	0.561602	0.809111	0.359931	0.275843	0.629413	0.165277	0.150091	0.19484	0.603769	0.0200635	0.0200635	0.639576	0.492638	0.0119287	0.045821	0.0313474	0.147974	0.00226154	0.0514974		0.368566	0.00547086	0.0150295	0.0275854	0.515865	0.375311	0.0259063	0.0133822	0.0133822	0.587187	0.133168	0.0863151	0.443957	0.188606	0.0248014	0.0339909	0.0402852	0.266497	0.00939834	0.525917	0.717161	0.690539	0.782774	0.895171
		N	20	17	17	17	17	17	20	20	17	17	17	20	20	20	20	17	20	17	17	17	20	20	20	20	17	20	17	17	17	20	20	20	20	17	17	17	19	13	11	15	18	20	11	13	19	19	16
	PlasmNo	Correlation Coefficient	.480*	-0.087366	-0.326386	.514*	0.46815	0.407159	-0.0139446	0.0967917	0.306907	-0.410217	0.209056	0.196209	0.374479	-0.374479	.454*	0.126875	.463*	0.344159	0.18022	0.408489	.658**	.752**	0.212429	1	.543*	0.0359537	-0.132561	-0.260238	0.345727	-0.138331	-0.0130395	0.0130395	-0.395296	0.115341	-0.317775	-0.331934	-.566*	-0.221729	-0.264506	-0.193769	-0.373134	0.0612614	-0.202721	0.166207	-0.322552	-0.400685	-0.344966
		Sig. (2-tailed)	0.0323282	0.738817	0.201043	0.0346725	0.0580642	0.104787	0.953471	0.68478	0.230834	0.101953	0.420669	0.40706	0.103798	0.103798	0.044593	0.627504	0.0399617	0.176159	0.488831	0.103547	0.00161987	0.000129629	0.368566		0.0243319	0.880382	0.612029	0.31308	0.174067	0.560829	0.956488	0.956488	0.0845168	0.659346	0.213886	0.193042	0.0115375	0.46659	0.431868	0.488961	0.127228	0.797512	0.549964	0.587347	0.178028	0.0891198	0.19069
		N	20	17	17	17	17	17	20	20	17	17	17	20	20	20	20	17	20	17	17	17	20	20	20	20	17	20	17	17	17	20	20	20	20	17	17	17	19	13	11	15	18	20	11	13	19	19	16
	InnateNo	Correlation Coefficient	-0.122549	-0.389011	-0.305495	0.0813187	0.375824	0.142857	0.117647	0.0429448	-0.0637646	0.237248	-0.196319	-0.213066	0.0492008	-0.0492008	0.188777	0.109203	.925**	.843**	.755**	.786**	.807**	.794**	.642**	.543*	1	-0.366449	-0.427958	0.00490798	-0.0675678	0.217544	-0.223588	0.223588	-0.0280885	0.380368	0.258903	0.0905977	-0.24692	0.452361	0.302532	0.470798	-0.249399	0.274215	-0.309524	-0.261399	-0.260283	-0.253849	0.0132013
		Sig. (2-tailed)	0.639378	0.169217	0.28817	0.782275	0.18541	0.626117	0.652933	0.870004	0.807905	0.359208	0.450138	0.411606	0.851252	0.851252	0.468069	0.676525	1.12169e-07	2.13281e-05	0.0004641	0.000183427	8.89482e-05	0.000142982	0.00547086	0.0243319		0.147976	0.0865844	0.985085	0.796667	0.401611	0.388327	0.388327	0.91478	0.132035	0.315659	0.729491	0.339356	0.120651	0.42878	0.104423	0.370036	0.286838	0.455645	0.465685	0.312994	0.325532	0.964274
		N	17	14	14	14	14	14	17	17	17	17	17	17	17	17	17	17	17	17	17	17	17	17	17	17	17	17	17	17	17	17	17	17	17	17	17	17	17	13	9	13	15	17	8	10	17	17	14
	GenLeukPBL	Correlation Coefficient	0.330281	0.141401	0.0219285	0.32061	0.106618	0.17316	-0.235762	0.133838	0.192596	-0.30817	0.294631	0.0383053	.490*	-.490*	0.28626	-0.0290307	-0.386101	-0.323265	-0.303896	-0.223461	-0.334729	-0.175538	-.535*	0.0359537	-0.366449	1	0.267123	0.0291338	0.0598262	-.483*	0.185747	-0.185747	-0.234264	-0.146268	-0.412936	0.030494	-.499*	-.788**	-0.384381	-.538*	-0.102679	-0.209504	.654*	-0.0220996	0.241189	-0.223227	0.197406
		Sig. (2-tailed)	0.114964	0.552079	0.926886	0.168143	0.654595	0.465345	0.290851	0.573746	0.458945	0.228822	0.250979	0.872618	0.0283847	0.0283847	0.221115	0.911932	0.0926765	0.205639	0.235677	0.388603	0.149142	0.459141	0.0150295	0.880382	0.147976		0.254899	0.902957	0.802164	0.0167735	0.39613	0.39613	0.281974	0.538333	0.0994803	0.898449	0.0295908	0.00136925	0.217325	0.0384156	0.685162	0.337347	0.011151	0.940224	0.292231	0.330721	0.432355
		N	24	20	20	20	20	20	22	20	17	17	17	20	20	20	20	17	20	17	17	17	20	20	20	20	17	24	20	20	20	24	23	23	23	20	17	20	19	13	12	15	18	23	14	14	21	21	18
	TcellPBL	Correlation Coefficient	0.147535	-0.00589102	-0.0265096	0.0206186	-0.00736378	-0.12813	0.0316067	.549*	.583*	0.0246003	0.219153	-0.0706451	0.299078	-0.299078	0.0444453	-.577*	-0.279141	-0.128755	-0.179865	-0.0625767	-0.265602	-0.164719	-.533*	-0.132561	-0.427958	0.267123	1	-0.26526	0.36991	-0.254047	0.172019	-0.172019	0.261239	-.928**	-0.17057	-0.266771	-0.148243	-0.237746	-.646*	-0.241302	0.0896081	-0.190148	-0.134149	0.00456621	-0.106813	-0.0456453	-0.125276
		Sig. (2-tailed)	0.534781	0.982725	0.922367	0.939585	0.978407	0.636283	0.897794	0.0223441	0.0140752	0.925334	0.39805	0.787601	0.243558	0.243558	0.8655	0.0152985	0.277916	0.62237	0.489703	0.811423	0.302846	0.527543	0.0275854	0.612029	0.0865844	0.254899		0.258354	0.108425	0.279771	0.481316	0.481316	0.280004	3.65806e-09	0.512768	0.255549	0.570159	0.434127	0.043507	0.427076	0.750802	0.435556	0.711774	0.989369	0.663397	0.852796	0.643877
		N	20	16	16	16	16	16	19	17	17	17	17	17	17	17	17	17	17	17	17	17	17	17	17	17	17	20	20	20	20	20	19	19	19	20	17	20	17	13	10	13	15	19	10	11	19	19	16
	CD4TcellPBL	Correlation Coefficient	0.0986075	0.159058	0.0986746	-0.335788	-0.406481	-0.326952	0.171203	0.0288698	-.552*	-0.0916925	-0.212531	0.0934098	-.538*	.538*	0.0870921	0.374693	-0.0871701	-0.213497	-0.137592	-0.205648	-0.139681	-0.171714	0.169337	-0.260238	0.00490798	0.0291338	-0.26526	1	-.934**	0.197422	0.234932	-0.234932	0.261239	0.146793	0.126402	.939**	0.170584	0.0774799	0.0123091	0.0111739	.525*	-0.256788	.677*	-0.14123	0.293626	0.420205	0.0618557
		Sig. (2-tailed)	0.679166	0.556273	0.716179	0.203547	0.118197	0.216443	0.483431	0.912419	0.0214557	0.726339	0.41281	0.721404	0.0260464	0.0260464	0.739609	0.138384	0.739384	0.410638	0.598464	0.428453	0.592867	0.509903	0.515865	0.31308	0.985085	0.902957	0.258354		1.68384e-09	0.404109	0.332962	0.332962	0.280004	0.536861	0.628798	9.28606e-10	0.512733	0.801361	0.973078	0.9711	0.0443321	0.288576	0.0315869	0.678724	0.222421	0.07325	0.819981
		N	20	16	16	16	16	16	19	17	17	17	17	17	17	17	17	17	17	17	17	17	17	17	17	17	17	20	20	20	20	20	19	19	19	20	17	20	17	13	10	13	15	19	10	11	19	19	16
	CD8TcellPBL	Correlation Coefficient	-0.0580039	-0.156112	-0.0765833	0.371134	0.472755	0.340207	-0.195165	0.0694957	.589*	0.0831793	0.245388	-0.0461304	.603*	-.603*	0.0909099	-0.442805	0.038107	0.147421	0.092866	0.141979	0.0841594	0.17067	-0.229621	0.345727	-0.0675678	0.0598262	0.36991	-.934**	1	-0.243517	-0.21743	0.21743	-0.312956	-0.311556	-0.165746	-.973**	-0.320548	-0.315554	-0.275554	-0.254206	-0.487316	0.225789	-0.559636	0.0844749	-0.18706	-0.311425	-0.157817
		Sig. (2-tailed)	0.808081	0.563701	0.778022	0.156991	0.0644158	0.197289	0.423307	0.790984	0.0128899	0.750952	0.342459	0.860447	0.0104039	0.0104039	0.728591	0.0750719	0.88455	0.572324	0.722965	0.586735	0.748106	0.512517	0.375311	0.174067	0.796667	0.802164	0.108425	1.68384e-09		0.300856	0.371227	0.371227	0.19203	0.181166	0.524936	6.84886e-13	0.209693	0.293604	0.440947	0.401976	0.0654028	0.352653	0.0925316	0.804953	0.443184	0.19433	0.559395
		N	20	16	16	16	16	16	19	17	17	17	17	17	17	17	17	17	17	17	17	17	17	17	17	17	17	20	20	20	20	20	19	19	19	20	17	20	17	13	10	13	15	19	10	11	19	19	16
	BcellPBL	Correlation Coefficient	-0.319367	-0.278891	-0.10031	-.584**	-0.311568	-0.430875	0.232084	-0.0289541	-0.115719	0.280291	0.0143955	-0.164924	-0.343664	0.343664	-0.431534	-0.24535	0.161793	0.30131	0.390557	0.314631	0.101956	0.0139647	.497*	-0.138331	0.217544	-.483*	-0.254047	0.197422	-0.243517	1	-.547**	.547**	0.176391	-0.0088131	0.172602	0.18072	.549*	0.355811	0.572719	0.296503	0.00598665	.560**	-0.102915	-0.168029	-0.0612901	0.264952	-0.143536
		Sig. (2-tailed)	0.128208	0.233757	0.673918	0.00690346	0.181148	0.0578775	0.298663	0.903553	0.658293	0.275858	0.956269	0.487147	0.137921	0.137921	0.0574533	0.342535	0.495567	0.239887	0.12115	0.218704	0.668855	0.953404	0.0259063	0.560829	0.401611	0.0167735	0.279771	0.404109	0.300856		0.006962	0.006962	0.420756	0.970584	0.507682	0.445776	0.0148152	0.232799	0.0516197	0.283229	0.981191	0.00545516	0.726262	0.565833	0.791845	0.245762	0.569893
		N	24	20	20	20	20	20	22	20	17	17	17	20	20	20	20	17	20	17	17	17	20	20	20	20	17	24	20	20	20	24	23	23	23	20	17	20	19	13	12	15	18	23	14	14	21	21	18
	MemBcellPBL	Correlation Coefficient	0.00791688	-0.00150603	0.0060241	0.0120482	0.0361446	0.158886	0.0266667	0.171946	-0.0258144	-0.429452	0.252768	0.133521	0.208098	-0.208098	0.262343	0.221402	-0.247551	-0.323097	-0.426815	-0.287646	-0.133538	-0.0917603	-.543*	-0.0130395	-0.223588	0.185747	0.172019	0.234932	-0.21743	-.547**	1	-1.000**	0.143482	-0.0506162	-0.324425	0.274344	-0.339417	-0.0929758	-0.533862	-0.0500964	-0.0590222	-.989**	0.185431	0.228225	-0.170437	-0.231648	0.16595
		Sig. (2-tailed)	0.971401	0.994972	0.979891	0.959793	0.879751	0.503447	0.908652	0.468527	0.921659	0.085372	0.327667	0.574662	0.378636	0.378636	0.263821	0.393102	0.292667	0.205888	0.0875214	0.262915	0.574614	0.700419	0.0133822	0.956488	0.388327	0.39613	0.481316	0.332962	0.371227	0.006962			0.513671	0.83696	0.203923	0.255691	0.155125	0.762571	0.073812	0.859273	0.816045	9.94294e-19	0.525641	0.432591	0.472496	0.325751	0.524419
		N	23	20	20	20	20	20	21	20	17	17	17	20	20	20	20	17	20	17	17	17	20	20	20	20	17	23	19	19	19	23	23	23	23	19	17	19	19	13	12	15	18	23	14	14	20	20	17
	NvBcellPBL	Correlation Coefficient	-0.00791688	0.00150603	-0.0060241	-0.0120482	-0.0361446	-0.158886	-0.0266667	-0.171946	0.0258144	0.429452	-0.252768	-0.133521	-0.208098	0.208098	-0.262343	-0.221402	0.247551	0.323097	0.426815	0.287646	0.133538	0.0917603	.543*	0.0130395	0.223588	-0.185747	-0.172019	-0.234932	0.21743	.547**	-1.000**	1	-0.143482	0.0506162	0.324425	-0.274344	0.339417	0.0929758	0.533862	0.0500964	0.0590222	.989**	-0.185431	-0.228225	0.170437	0.231648	-0.16595
		Sig. (2-tailed)	0.971401	0.994972	0.979891	0.959793	0.879751	0.503447	0.908652	0.468527	0.921659	0.085372	0.327667	0.574662	0.378636	0.378636	0.263821	0.393102	0.292667	0.205888	0.0875214	0.262915	0.574614	0.700419	0.0133822	0.956488	0.388327	0.39613	0.481316	0.332962	0.371227	0.006962			0.513671	0.83696	0.203923	0.255691	0.155125	0.762571	0.073812	0.859273	0.816045	9.94294e-19	0.525641	0.432591	0.472496	0.325751	0.524419
		N	23	20	20	20	20	20	21	20	17	17	17	20	20	20	20	17	20	17	17	17	20	20	20	20	17	23	19	19	19	23	23	23	23	19	17	19	19	13	12	15	18	23	14	14	20	20	17
	PlasmPBL	Correlation Coefficient	-0.0909469	-0.0872892	-0.220648	-0.239237	-0.278032	-0.250552	0.224936	0.214348	-0.291764	0.4186	0.127223	-0.332229	-0.222983	0.222983	0.0250464	-0.129902	0.082029	0.0628648	0.0917346	0.0468429	-0.201887	-0.302677	0.129209	-0.395296	-0.0280885	-0.234264	0.261239	0.261239	-0.312956	0.176391	0.143482	-0.143482	1	-0.283811	0.020284	0.288051	0.169778	0.240107	-0.289384	0.0418242	0.456608	-0.172343	-0.280257	0.203968	-0.179691	0.29332	-0.114124
		Sig. (2-tailed)	0.679827	0.714415	0.34988	0.309696	0.23526	0.286664	0.326935	0.364152	0.255836	0.0944669	0.626553	0.152391	0.344673	0.344673	0.916523	0.619249	0.730994	0.810569	0.726218	0.858312	0.393342	0.194585	0.587187	0.0845168	0.91478	0.281974	0.280004	0.280004	0.19203	0.420756	0.513671	0.513671		0.238986	0.938409	0.231736	0.487133	0.429439	0.361604	0.882347	0.0568062	0.431665	0.331799	0.484281	0.448415	0.209431	0.66274
		N	23	20	20	20	20	20	21	20	17	17	17	20	20	20	20	17	20	17	17	17	20	20	20	20	17	23	19	19	19	23	23	23	23	19	17	19	19	13	12	15	18	23	14	14	20	20	17
	InnatePBL	Correlation Coefficient	-0.050509	0.172567	0.172567	0.168142	0.126844	0.348084	-0.109059	-.492*	-.539*	-0.116923	-0.252457	0.0681639	-0.211823	0.211823	-0.000617675	.674**	0.193984	0.0662577	0.0866093	0.00306937	0.212612	0.117191	0.379342	0.115341	0.380368	-0.146268	-.928**	0.146793	-0.311556	-0.0088131	-0.0506162	0.0506162	-0.283811	1	0.146293	0.217512	0.0568614	0.234933	.646*	0.171562	-0.176173	0.0684477	-0.0214724	0.00686501	0.0581242	0.0147936	0.279174
		Sig. (2-tailed)	0.832518	0.522759	0.522759	0.533633	0.6397	0.186446	0.656728	0.0448408	0.0255802	0.654944	0.328282	0.794909	0.414403	0.414403	0.998123	0.00301862	0.455652	0.800534	0.741006	0.990672	0.412626	0.654199	0.133168	0.659346	0.132035	0.538333	3.65806e-09	0.536861	0.181166	0.970584	0.83696	0.83696	0.238986		0.575298	0.356943	0.828394	0.439746	0.043507	0.575187	0.52996	0.780684	0.953051	0.984018	0.813156	0.952069	0.295046
		N	20	16	16	16	16	16	19	17	17	17	17	17	17	17	17	17	17	17	17	17	17	17	17	17	17	20	20	20	20	20	19	19	19	20	17	20	17	13	10	13	15	19	10	11	19	19	16
	CD4to8CSF	Correlation Coefficient	-0.384509	-0.20239	0.102332	-0.218309	-0.0181924	-0.0523031	0.361439	0.144368	-0.0711778	.674**	-.921**	-0.181303	-0.324825	0.324825	-.487*	-0.110361	0.317415	0.370411	.502*	0.133378	0.132996	0.13289	0.428289	-0.317775	0.258903	-0.412936	-0.17057	0.126402	-0.165746	0.172602	-0.324425	0.324425	0.020284	0.146293	1	0.193454	0.454512	.602*	0.339246	.600*	0.286741	0.291333	0.121988	-0.18696	-0.0102725	0.255634	0.238182
		Sig. (2-tailed)	0.127532	0.487741	0.727758	0.453378	0.95078	0.859057	0.154022	0.58039	0.786034	0.00298981	1.60947e-07	0.486179	0.203333	0.203333	0.0473389	0.67327	0.214435	0.143311	0.0401513	0.609817	0.61085	0.611137	0.0863151	0.213886	0.315659	0.0994803	0.512768	0.628798	0.524936	0.507682	0.203923	0.203923	0.938409	0.575298		0.456909	0.0668155	0.0295557	0.37179	0.0303289	0.300126	0.256571	0.773532	0.605022	0.968787	0.322023	0.412212
		N	17	14	14	14	14	14	17	17	17	17	17	17	17	17	17	17	17	17	17	17	17	17	17	17	17	17	17	17	17	17	17	17	17	17	17	17	17	13	9	13	15	17	8	10	17	17	14
	CD4to8PBL	Correlation Coefficient	0.0744888	0.121836	0.0827278	-0.324895	-0.389573	-0.345953	0.247925	0.106457	-.495*	-0.0845656	-0.256379	-0.0038835	-.626**	.626**	-0.0766456	0.380473	-0.00251814	-0.0817895	-0.0302363	-0.077433	-0.0697211	-0.154886	0.198954	-0.331934	0.0905977	0.030494	-0.266771	.939**	-.973**	0.18072	0.274344	-0.274344	0.288051	0.217512	0.193454	1	0.292829	0.271287	0.141512	0.23321	0.504249	-0.279311	0.61806	-0.168998	0.217332	0.301551	0.203648
		Sig. (2-tailed)	0.754958	0.653078	0.760678	0.219518	0.135815	0.18934	0.306116	0.684259	0.0431451	0.746928	0.320568	0.988198	0.00713286	0.00713286	0.769999	0.131919	0.992347	0.754992	0.908289	0.767696	0.790321	0.5528	0.443957	0.193042	0.729491	0.898449	0.255549	9.28606e-10	6.84886e-13	0.445776	0.255691	0.255691	0.231736	0.356943	0.456909		0.254026	0.369952	0.696567	0.443206	0.0552727	0.246837	0.0568509	0.61937	0.371446	0.209605	0.449352
		N	20	16	16	16	16	16	19	17	17	17	17	17	17	17	17	17	17	17	17	17	17	17	17	17	17	20	20	20	20	20	19	19	19	20	17	20	17	13	10	13	15	19	10	11	19	19	16
	NvtoPlas	Correlation Coefficient	-.588**	-0.292955	0.0327158	-.576*	-0.352438	-.540*	0.345764	0.175696	-0.134654	0.200621	-0.35353	-0.163053	-.786**	.786**	-.896**	-0.0395558	-0.0838181	-0.0790145	0.0370835	-0.15442	-0.218906	-0.410631	0.315258	-.566*	-0.24692	-.499*	-0.148243	0.170584	-0.320548	.549*	-0.339417	0.339417	0.169778	0.0568614	0.454512	0.292829	1	.740**	0.564858	.656**	.617**	0.345292	0.317925	-0.14566	0.301833	0.378749	-0.161073
		Sig. (2-tailed)	0.00812852	0.270832	0.904262	0.0196685	0.180623	0.0309042	0.147058	0.471848	0.606371	0.44007	0.163906	0.504793	6.56614e-05	6.56614e-05	2.09503e-07	0.88019	0.732989	0.763078	0.887632	0.554011	0.367907	0.0807473	0.188606	0.0115375	0.339356	0.0295908	0.570159	0.512733	0.209693	0.0148152	0.155125	0.155125	0.487133	0.828394	0.0668155	0.254026		0.00382693	0.0888778	0.00797526	0.00827681	0.147648	0.370672	0.65149	0.209159	0.121155	0.551215
		N	19	16	16	16	16	16	19	19	17	17	17	19	19	19	19	17	19	17	17	17	19	19	19	19	17	19	17	17	17	19	19	19	19	17	17	17	19	13	10	15	17	19	10	12	19	18	16
	InnatetoPlas	Correlation Coefficient	-.655*	-0.4019	-0.175543	-0.378802	-0.0415759	-0.175543	0.216347	0.0183134	-0.101149	0.401487	-.587*	0.0303915	-.579*	.579*	-.871**	0.12239	0.347475	0.379309	0.303447	0.221966	.562*	0.341411	.617*	-0.221729	0.452361	-.788**	-0.237746	0.0774799	-0.315554	0.355811	-0.0929758	0.0929758	0.240107	0.234933	.602*	0.271287	.740**	1	.975**	.900**	0.356637	0.122512	0.0545545	-0.102579	-0.201726	-0.0581435	-0.150294
		Sig. (2-tailed)	0.0151782	0.220473	0.605657	0.250624	0.903398	0.605657	0.477748	0.952649	0.74231	0.173902	0.0350811	0.921489	0.0383073	0.0383073	0.000107015	0.690392	0.244705	0.201164	0.313511	0.4661	0.0455721	0.253592	0.0248014	0.46659	0.120651	0.00136925	0.434127	0.801361	0.293604	0.232799	0.762571	0.762571	0.429439	0.439746	0.0295557	0.369952	0.00382693		0.00481823	2.72522e-05	0.255146	0.690099	0.907523	0.792851	0.508679	0.850349	0.65915
		N	13	11	11	11	11	11	13	13	13	13	13	13	13	13	13	13	13	13	13	13	13	13	13	13	13	13	13	13	13	13	13	13	13	13	13	13	13	13	5	13	12	13	7	9	13	13	11
	IL6CSF	Correlation Coefficient	-.632*	-.661*	-0.130893	-0.448775	0.0560968	-0.0560968	0.0426342	-0.297941	-0.514773	0.0675111	-0.215192	-0.0213806	-0.506982	0.506982	-0.517204	0.59666	0.0921747	0.15967	0.130803	-0.0420183	0.292741	0.0549053	.640*	-0.264506	0.302532	-0.384381	-.646*	0.0123091	-0.275554	0.572719	-0.533862	0.533862	-0.289384	.646*	0.339246	0.141512	0.564858	.975**	1	.897*	0.0812696	0.553641	0.34178	-0.671131	0.166695	-0.0126354	0.0123494
		Sig. (2-tailed)	0.0273382	0.0375532	0.718528	0.193272	0.877674	0.877674	0.895334	0.373537	0.156171	0.862989	0.578181	0.950248	0.111464	0.111464	0.103255	0.0898701	0.787512	0.681556	0.737301	0.914527	0.382334	0.872618	0.0339909	0.431868	0.42878	0.217325	0.043507	0.973078	0.440947	0.0516197	0.073812	0.073812	0.361604	0.043507	0.37179	0.696567	0.0888778	0.00481823		0.0153499	0.835347	0.0618295	0.40732	0.0684317	0.624221	0.968912	0.976847
		N	12	10	10	10	10	10	12	11	9	9	9	11	11	11	11	9	11	9	9	9	11	11	11	11	9	12	10	10	10	12	12	12	12	10	9	10	10	5	12	6	9	12	8	8	11	12	8
	MemtoPlas	Correlation Coefficient	-.643**	-0.396704	-0.201146	-0.474927	-0.184383	-0.268194	0.287055	0.00273008	0.175504	0.442765	-0.539791	0.153847	-0.423392	0.423392	-.929**	-0.154824	0.395508	.557*	0.479155	0.417868	.587*	0.397814	.534*	-0.193769	0.470798	-.538*	-0.241302	0.0111739	-0.254206	0.296503	-0.0500964	0.0500964	0.0418242	0.171562	.600*	0.23321	.656**	.900**	.897*	1	0.275763	0.0986179	0.178369	0.0993138	-0.308776	-0.351739	0.160373
		Sig. (2-tailed)	0.00969637	0.17957	0.509926	0.101003	0.546492	0.375647	0.299574	0.992296	0.566298	0.12973	0.0569008	0.584083	0.115819	0.115819	5.54126e-07	0.61353	0.144512	0.0479214	0.0975809	0.155363	0.0212827	0.141974	0.0402852	0.488961	0.104423	0.0384156	0.427076	0.9711	0.401976	0.283229	0.859273	0.859273	0.882347	0.575187	0.0303289	0.443206	0.00797526	2.72522e-05	0.0153499		0.339935	0.726591	0.646127	0.771418	0.262808	0.217475	0.60071
		N	15	13	13	13	13	13	15	15	13	13	13	15	15	15	15	13	15	13	13	13	15	15	15	15	13	15	13	13	13	15	15	15	15	13	13	13	15	13	6	15	14	15	9	11	15	14	13
	NvtoMemCSF	Correlation Coefficient	-0.294349	-0.141684	-0.0929325	-0.335167	-0.321455	-0.469233	0.294349	0.223936	-0.188817	0.21762	-0.294427	0.0985742	-.791**	.791**	-0.317743	0.102409	-0.0942402	-0.147082	-0.102501	-0.256023	-0.126572	-0.295243	0.276611	-0.373134	-0.249399	-0.102679	0.0896081	.525*	-0.487316	0.00598665	-0.0590222	0.0590222	0.456608	-0.176173	0.286741	0.504249	.617**	0.356637	0.0812696	0.275763	1	0.0317766	0.396959	-0.0362011	0.480782	0.213134	-0.468897
		Sig. (2-tailed)	0.235758	0.587522	0.722774	0.188478	0.208334	0.0574077	0.235758	0.371699	0.500346	0.435906	0.286775	0.697172	9.17681e-05	9.17681e-05	0.198828	0.716473	0.709928	0.600915	0.716228	0.357033	0.616745	0.234272	0.266497	0.127228	0.370036	0.685162	0.750802	0.0443321	0.0654028	0.981191	0.816045	0.816045	0.0568062	0.52996	0.300126	0.0552727	0.00827681	0.255146	0.835347	0.339935		0.90039	0.226734	0.906535	0.0507466	0.411454	0.0907762
		N	18	17	17	17	17	17	18	18	15	15	15	18	18	18	18	15	18	15	15	15	18	18	18	18	15	18	15	15	15	18	18	18	18	15	15	15	17	12	9	14	18	18	11	13	17	17	14
	NvtoMemPBL	Correlation Coefficient	-0.0110119	-0.0441944	-0.0365747	-0.0358127	-0.0441944	-0.179826	-0.0328538	-0.122864	0.0391089	0.382095	-0.21989	-0.145654	-0.20177	0.20177	-0.272383	-0.21989	0.302734	0.366033	0.462762	0.333977	0.193094	0.140251	.565**	0.0612614	0.274215	-0.209504	-0.190148	-0.256788	0.225789	.560**	-.989**	.989**	-0.172343	0.0684477	0.291333	-0.279311	0.345292	0.122512	0.553641	0.0986179	0.0317766	1	-0.193964	-0.233809	0.15508	0.164278	-0.16917
		Sig. (2-tailed)	0.960228	0.853224	0.878331	0.880848	0.853224	0.448069	0.887575	0.605823	0.881535	0.130144	0.396426	0.540058	0.393624	0.393624	0.245305	0.396426	0.194497	0.148471	0.0614133	0.190149	0.414695	0.555351	0.00939834	0.797512	0.286838	0.337347	0.435556	0.288576	0.352653	0.00545516	9.94294e-19	9.94294e-19	0.431665	0.780684	0.256571	0.246837	0.147648	0.690099	0.0618295	0.726591	0.90039		0.50641	0.421099	0.513853	0.488879	0.516286
		N	23	20	20	20	20	20	21	20	17	17	17	20	20	20	20	17	20	17	17	17	20	20	20	20	17	23	19	19	19	23	23	23	23	19	17	19	19	13	12	15	18	23	14	14	20	20	17
	AbetaPBL	Correlation Coefficient	0.00661525	-0.103639	-0.218303	-0.105844	-0.194047	-0.178612	0.143861	0.388128	-0.214286	-0.333333	-0.238095	0.209836	-0.13242	0.13242	-0.484018	0.357143	-0.405468	-0.333333	-0.238095	-0.619048	-0.18434	-0.116299	-0.214793	-0.202721	-0.309524	.654*	-0.134149	.677*	-0.559636	-0.102915	0.185431	-0.185431	-0.280257	-0.0214724	0.121988	0.61806	0.317925	0.0545545	0.34178	0.178369	0.396959	-0.193964	1	0.0296804	0.333337	0.0161297	-0.167365
		Sig. (2-tailed)	0.982094	0.724404	0.453389	0.718755	0.506224	0.541239	0.655557	0.23818	0.610344	0.419753	0.570156	0.535738	0.697923	0.697923	0.131412	0.385121	0.216016	0.419753	0.570156	0.101733	0.587405	0.733461	0.525917	0.549964	0.455645	0.011151	0.711774	0.0315869	0.0925316	0.726262	0.525641	0.525641	0.331799	0.953051	0.773532	0.0568509	0.370672	0.907523	0.40732	0.646127	0.226734	0.50641		0.930969	0.316472	0.962458	0.666905
		N	14	14	14	14	14	14	12	11	8	8	8	11	11	11	11	8	11	8	8	8	11	11	11	11	8	14	10	10	10	14	14	14	14	10	8	10	10	7	8	9	11	14	14	11	11	11	9
	tauCSF	Correlation Coefficient	0.341034	0.314632	-0.0462046	0.279428	-0.156216	0.206821	-0.129813	-0.0730028	0.237083	-0.279637	0.0790277	0.492374	0.187328	-0.187328	-0.030303	-0.0911858	-0.247593	-0.340427	-0.316111	-0.25532	0.00416099	-0.00423866	-0.111381	0.166207	-0.261399	-0.0220996	0.00456621	-0.14123	0.0844749	-0.168029	0.228225	-0.228225	0.203968	0.00686501	-0.18696	-0.168998	-0.14566	-0.102579	-0.671131	0.0993138	-0.0362011	-0.233809	0.0296804	1	-0.369146	-0.496562	0.254545
		Sig. (2-tailed)	0.232769	0.273248	0.875366	0.333291	0.593824	0.478056	0.658264	0.81265	0.509561	0.433926	0.828202	0.0873944	0.539989	0.539989	0.921717	0.802181	0.414743	0.335782	0.373561	0.476493	0.989236	0.989035	0.717161	0.587347	0.465685	0.940224	0.989369	0.678724	0.804953	0.565833	0.432591	0.432591	0.484281	0.984018	0.605022	0.61937	0.65149	0.792851	0.0684317	0.771418	0.906535	0.421099	0.930969		0.214498	0.0843263	0.450037
		N	14	14	14	14	14	14	14	13	10	10	10	13	13	13	13	10	13	10	10	10	13	13	13	13	10	14	11	11	11	14	14	14	14	11	10	11	12	9	8	11	13	14	11	14	13	13	11
	IgGCSF	Correlation Coefficient	-0.224894	0.198773	.487*	0.00245399	0.244172	0.0404908	-.454*	-0.0457143	-0.38575	-0.10037	-0.0682237	-0.188464	-0.389256	0.389256	-0.164608	0.323909	-0.184974	-0.346225	-0.247081	-0.311425	-0.391347	-0.442953	-0.0977531	-0.322552	-0.260283	0.241189	-0.106813	0.293626	-0.18706	-0.0612901	-0.170437	0.170437	-0.179691	0.0581242	-0.0102725	0.217332	0.301833	-0.201726	0.166695	-0.308776	0.480782	0.15508	0.333337	-0.369146	1	0.344857	-0.307136
		Sig. (2-tailed)	0.327026	0.44438	0.0473485	0.992542	0.344931	0.877378	0.0385387	0.852576	0.126205	0.70151	0.794733	0.439708	0.0995046	0.0995046	0.500682	0.204685	0.448378	0.173406	0.339032	0.223688	0.0975426	0.0575206	0.690539	0.178028	0.312994	0.292231	0.663397	0.222421	0.443184	0.791845	0.472496	0.472496	0.448415	0.813156	0.968787	0.371446	0.209159	0.508679	0.624221	0.262808	0.0507466	0.513853	0.316472	0.214498		0.13647	0.215067
		N	21	17	17	17	17	17	21	19	17	17	17	19	19	19	19	17	19	17	17	17	19	19	19	19	17	21	19	19	19	21	20	20	20	19	17	19	19	13	11	15	17	20	11	13	21	20	18
	IgGPBL	Correlation Coefficient	-0.0480946	0.35252	.550*	0.0235013	0.0927684	0.0568979	0.138354	0.144857	-0.339511	0.211141	-0.248499	-.551*	-0.318248	0.318248	-0.201449	0.0534744	-0.127755	-0.245052	-0.091221	-0.209994	-.557*	-.497*	-0.0677801	-0.400685	-0.253849	-0.223227	-0.0456453	0.420205	-0.311425	0.264952	-0.231648	0.231648	0.29332	0.0147936	0.255634	0.301551	0.378749	-0.0581435	-0.0126354	-0.351739	0.213134	0.164278	0.0161297	-0.496562	0.344857	1	-0.14332
		Sig. (2-tailed)	0.835994	0.165198	0.022049	0.928661	0.723246	0.828285	0.549783	0.554062	0.182457	0.415942	0.336177	0.0144289	0.18422	0.18422	0.408229	0.838485	0.602221	0.34314	0.727696	0.41854	0.0132416	0.0303848	0.782774	0.0891198	0.325532	0.330721	0.852796	0.07325	0.19433	0.245762	0.325751	0.325751	0.209431	0.952069	0.322023	0.209605	0.121155	0.850349	0.968912	0.217475	0.411454	0.488879	0.962458	0.0843263	0.13647		0.583172
		N	21	17	17	17	17	17	21	19	17	17	17	19	19	19	19	17	19	17	17	17	19	19	19	19	17	21	19	19	19	21	20	20	20	19	17	19	18	13	12	14	17	20	11	13	20	21	17
	IFNgPBL	Correlation Coefficient	0.134228	0.296703	0.296703	-0.0725275	-0.292308	0.0461538	-0.0464636	-0.336772	-0.112211	0.379428	-0.203969	0.0345941	0.201626	-0.201626	0.0583459	-0.199339	-0.107511	0.10121	0.228225	-0.0176211	-0.0821014	-0.0647844	-0.0358378	-0.344966	0.0132013	0.197406	-0.125276	0.0618557	-0.157817	-0.143536	0.16595	-0.16595	-0.114124	0.279174	0.238182	0.203648	-0.161073	-0.150294	0.0123494	0.160373	-0.468897	-0.16917	-0.167365	0.254545	-0.307136	-0.14332	1
		Sig. (2-tailed)	0.595411	0.302967	0.302967	0.805376	0.310526	0.875503	0.85474	0.202142	0.70252	0.180889	0.484279	0.898791	0.453964	0.453964	0.830053	0.494463	0.691875	0.730641	0.432591	0.952324	0.762441	0.811597	0.895171	0.19069	0.964274	0.432355	0.643877	0.819981	0.559395	0.569893	0.524419	0.524419	0.66274	0.295046	0.412212	0.449352	0.551215	0.65915	0.976847	0.60071	0.0907762	0.516286	0.666905	0.450037	0.215067	0.583172
		N	18	14	14	14	14	14	18	16	14	14	14	16	16	16	16	14	16	14	14	14	16	16	16	16	14	18	16	16	16	18	17	17	17	16	14	16	16	11	8	13	14	17	9	11	18	17	18
	IFNgCSF	Correlation Coefficient	0.436332	0.30206	0.0181964	0.422156	0.123735	0.385763	-.604*	-.580*	-0.0690066	-0.0862582	-0.172516	0.444435	0.404255	-0.404255	0.146405	0.655562	0	-0.293278	-0.431291	-0.241523	0.462798	0.390958	-0.165417	0.205201	-0.0345033	-0.0351195	-0.153152	-0.203739	0.0370434	-0.520611	0.435327	-0.435327	0.0677862	0.430924	-0.122826	-0.0756503	-0.418313	0.289619	-0.154321	0.24588	-0.211523	-0.468969	-0.184388	.634*	-0.145895	-.626*	0.0604756
		Sig. (2-tailed)	0.118812	0.339972	0.95524	0.171613	0.701626	0.215534	0.0222709	0.0478969	0.859978	0.825362	0.657153	0.147746	0.192447	0.192447	0.649806	0.055246	1	0.443723	0.246433	0.531268	0.129763	0.208887	0.60741	0.522312	0.92978	0.905126	0.653016	0.547921	0.913893	0.0563034	0.137071	0.137071	0.825847	0.185774	0.752905	0.825041	0.200415	0.449692	0.715209	0.466126	0.532388	0.105963	0.634848	0.0362286	0.634369	0.0219695	0.859799
		N	14	12	12	12	12	12	14	12	9	9	9	12	12	12	12	9	12	9	9	9	12	12	12	12	9	14	11	11	11	14	13	13	13	11	9	11	11	9	8	11	11	13	9	11	13	13	11
**. Correlation is significant at the 0.01 level (2-tailed).
*. Correlation is significant at the 0.05 level (2-tailed).
[truncated: 1 more columns]
